# Supplementary material for: Great vessel development requires biallelic expression of Chd7 and Tbx1 in pharyngeal ectoderm in mice
Source: JCI journal article supplement (doi:10.1172/jci37561), 2009-10-12
Supplement: sd1 [file 1]

301 Moved Permanently

# Moved Permanently

The document has moved here.
